# Supplementary material for: A Systematic Review of the Complex Effects of Cannabinoids on Cerebral and Peripheral Circulation in Animal Models
Source: PubMed Central journal article supplement (PMC5986896; doi:10.3389/fphys.2018.00622), 2018-05-29
Supplement: Image_1.pdf [file Image_1.pdf]

**Supplementary Material:**

**A systematic review of the complex effects of cannabinoids on cerebral and peripheral circulation in animal models**

**1 SUPPLEMENTARY TABLES AND FIGURES**

**1.1 Figures**

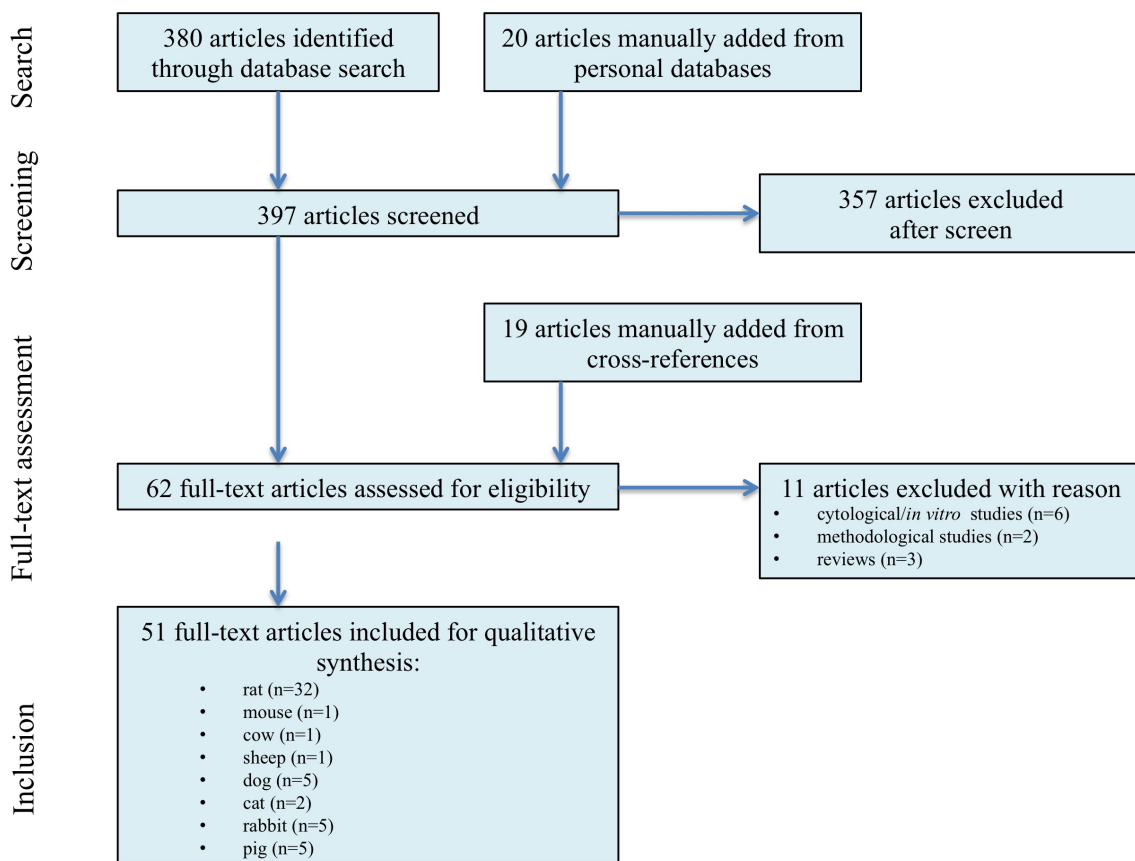

**Figure S1.** Article search and inclusion flow-chart

## **1.2 Tables**

Table S1: Studies indicative of vasodilative effects of cannabinoids in animal models.

| Animal model | Reference              | <i>in vitro</i><br><i>in vivo</i> | Consc.      | Bed         | Molecule   | Dose                                    | Appl. | Targ.     | Effect                                                                  |
|--------------|------------------------|-----------------------------------|-------------|-------------|------------|-----------------------------------------|-------|-----------|-------------------------------------------------------------------------|
| rat          | Graham and Li (1973)   | <i>in vivo</i>                    | ur.<br>g.a. | hindqu.     | c.e.       | 10mg/kg                                 | i.v.  | unsp.     | systemic BP↓, HR↓, resp.rate↓                                           |
|              |                        |                                   |             |             |            | 50mg/kg/day                             | i.p.  | unsp.     | develops tolerance                                                      |
|              |                        |                                   |             |             | Δ1-THC     | 0.5mg/kg                                | i.v.  | unsp.     | as for c.e.                                                             |
|              |                        |                                   |             |             | Δ6-THC     | 0.5mg/kg                                | i.v.  | unsp.     | as for c.e.                                                             |
|              |                        |                                   |             | cannabinol  | 1mg/kg     | i.v.                                    | unsp. | no effect |                                                                         |
|              |                        |                                   |             | cannabidiol | 1mg/kg     | i.v.                                    | unsp. | no effect |                                                                         |
| rat          | Adams et al. (1976)    | <i>in vivo</i>                    | ur.<br>g.a. | systemic    | Δ8-/Δ9-THC | unavailable                             | i.v.  | unsp.     | transient BP↑, followed by prolonged BP↓, HR↓                           |
|              |                        |                                   |             | hindqu.     | Δ8-/Δ9-THC | unavailable                             | i.a.  | unsp.     | vasoconstriction                                                        |
| rat          | Kosersky (1978)        | <i>in vivo</i>                    | consc.      | systemic    | Δ9-THC     | 25mg/kg                                 | oral  | unsp.     | systolic BP↓ in spontaneously hypertensive rats                         |
| rat          | Siqueira et al. (1979) | <i>in vivo</i>                    | ur.<br>g.a. | systemic    | Δ9-THC     | 2-<br>10mg/kg                           | i.v.  | unsp.     | immediate BP↓, HR↓, BP↑ at 30", persistent BP↓ at 5' (vagal?)           |
| rat          | Varga et al. (1996)    | <i>in vivo</i>                    | ur.<br>g.a. | systemic    | AEA        | 4mg/kg                                  | i.v.  | CB1r      | transient BP↓, brief BP↑, prolonged BP↓                                 |
| rat          | Bloom et al. (1997)    | <i>in vivo</i>                    | consc.      | cerebral    | Δ9-THC     | 0.5mg/kg<br>1mg/kg<br>4mg/kg<br>16mg/kg | i.v.  | unsp.     | increase and decrease of CBF depending on region (see text for details) |
|              |                        |                                   |             |             | 11-OH-THC  | 4mg/kg                                  | i.v.  | unsp.     | increase and decrease of CBF                                            |
| rat          | Stein et al. (1998)    | <i>in vivo</i>                    | consc.      | cerebral    | AEA        | 3mg/kg                                  | i.v.  | CB1r      | no effect on rCBF                                                       |

Table S1 continued

|     |                            |                 |          |                |                                                                            |                             |              |                                    |                                                                                                                              |
|-----|----------------------------|-----------------|----------|----------------|----------------------------------------------------------------------------|-----------------------------|--------------|------------------------------------|------------------------------------------------------------------------------------------------------------------------------|
|     |                            |                 |          |                |                                                                            | 10mg/kg                     | i.v.         |                                    | rCBF↓ in 7 areas (including amygdala, cingulate, frontal, prepyriform, sensorimotor, claustrrocortex)                        |
|     |                            |                 |          |                |                                                                            | 30mg/kg                     | i.v.         |                                    | rCBF↓ in 23 areas (including CA1 and CA3 of hippocampus, rostral core portion of nucleus accumbens, rostral caudate nucleus) |
| rat | White and Hiley (1998)     | <i>in vitro</i> | -        | mes. art.      | AEA<br>CP 55,940<br>HU-210<br>palmytoyl-ethanolamide<br>R-(+)-WIN 55,212-2 | unsp.                       | perf.        | CB1r<br>CBr<br>CBr<br>CB2r<br>CB2r | relaxation in all (precontracted)                                                                                            |
| rat | Ho and Hiley (2003)        | <i>in vitro</i> | -        | mes. art.      | AEA<br>JWH 015<br>R-(+)-WIN 55,212-2<br>S-(+)-WIN 55,212-3                 | 1μM<br>30μM<br>60μM<br>60μM | perf.        | CB1r<br>CB2r<br>CB2r<br>unsp.      | relaxation in all (precontracted)                                                                                            |
| rat | Niederhoffer et al. (2003) | <i>in vivo</i>  | ur. g.a. | systemic       | WIN55212-2<br>CP55940                                                      | 30-1000μ/kg<br>30-1000μ/kg  | i.v.<br>i.v. | unsp.<br>unsp.                     | MAP↓, HR↓, plasma NA conc.↓ dose-dependently<br>MAP↓, HR↓, plasma NA conc.↓, max. at 30μg/kg                                 |
| rat | Wagner et al. (2005)       | <i>in vitro</i> | -        | isolated heart | AEA                                                                        | 1-100nmol                   | bolus        | CB1r                               | coronary vasodilation                                                                                                        |

Table S1 continued

|     |                           |                 |        |                          |                                                   |                                      |                |                                                                                                                                                                       |
|-----|---------------------------|-----------------|--------|--------------------------|---------------------------------------------------|--------------------------------------|----------------|-----------------------------------------------------------------------------------------------------------------------------------------------------------------------|
|     |                           |                 |        | Delta-THC                | 10-100nmol                                        | bolus                                | unsp.          | coronary vasoconstriction                                                                                                                                             |
| rat | O'Sullivan et al. (2005b) | <i>in vitro</i> | -      | aortic rings             | $\Delta 9$ -THC<br>cumulative $\mu\text{M}$ range | perf.                                | unsp.          | vasorelaxation/-constriction                                                                                                                                          |
|     |                           |                 |        | AEA<br>NADA              |                                                   |                                      | CB1r<br>CB1r   | vasorelaxation<br>vasorelaxation                                                                                                                                      |
| rat | O'Sullivan et al. (2005a) | <i>in vitro</i> | -      | aortic and mes. rings    | $\Delta 9$ -THC<br>cumulative $\mu\text{M}$ range | perf.                                | unsp.          | vasorelaxation in smaller branches, $\text{Ca}^{2+}$ -influx block; vasoconstriction in sup. mes. art. (stem) at high concentration; antagonism to AEA-vasorelaxation |
| rat | O'Sullivan et al. (2005c) | <i>in vitro</i> | -      | aortic and mes. rings    | $\Delta 9$ -THC<br>$10\mu\text{M}$                | perf.                                | unsp.          | time-dependent vasorelaxation mediated by $\text{PPAR}\gamma$                                                                                                         |
| rat | O'Sullivan et al. (2006)  | <i>in vitro</i> | -      | isolated aorta mes. art. | $\Delta 9$ -THC<br>$\Delta 9$ -THC                | $10\mu\text{M}$ , 2h incubation<br>- | unsp.          | no effect<br>enhanced endothelium-dependent vasorelaxation in sup. mes. art. and potentiated contraction in resistance vessels                                        |
| rat | Breyne et al. (2006)      | <i>in vitro</i> | -      | gastric artery           | methan-andamide                                   | $100\mu\text{mol/L}$                 | perf.<br>CB1r  | dose-dependent relaxation, probable $\text{Ca}^{2+}$ -influx $\downarrow$                                                                                             |
| rat | O'Sullivan et al. (2007)  | <i>in vitro</i> | consc. | isolated mes. art.       | $\Delta 9$ -THC                                   | cumulative $\mu\text{M}$ range       | perf.<br>unsp. | enhanced vasorelaxation in hypertensive rats                                                                                                                          |
|     |                           | <i>in vivo</i>  |        | hindqu. and systemic     | $\Delta 9$ -THC                                   | 1mg                                  | i.v.<br>CB1r   | mediated vasopressor effect (long-lasting $\text{BP}\uparrow$ ), not enhanced by hypertension                                                                         |

Table S1 continued

|     |                           |                 |        |                    |                                         |                                     |                         |                      |                                                                                                                                                                                          |
|-----|---------------------------|-----------------|--------|--------------------|-----------------------------------------|-------------------------------------|-------------------------|----------------------|------------------------------------------------------------------------------------------------------------------------------------------------------------------------------------------|
| rat | Wheal et al. (2007)       | <i>in vivo</i>  | consc. | systemic           | AEA<br>R-(+)-WIN<br>55,212-2            | 3mg/kg<br>150 $\mu$ g/kg            | i.v.<br>i.v.            | CB1r<br>CB1r         | hypotension in spontaneously hypertensive rats<br>hypotension in spontaneously hypertensive rats                                                                                         |
| rat | Pakdeechote et al. (2007) | <i>in vitro</i> | -      | isolated mes. art. | AEA<br>R-(+)-WIN<br>55,212-2<br>CP55940 | 1 $\mu$ M<br>1 $\mu$ M<br>1 $\mu$ M | perf.<br>perf.<br>perf. | CB1r<br>CB1r<br>CB1r | CB1r-mediated attenuation of neurogenic vasoconstriction<br>non CB1r-mediated attenuation of neurogenic vasoconstriction<br>non CB1r-mediated attenuation of neurogenic vasoconstriction |
| rat | Hillard et al. (2007)     | <i>in vitro</i> | -      | isolated MCA       | 2-AG                                    | 5-<br>10000nM                       | perf.                   | CB1r                 | attenuation of U-46619 induced vasoconstriction                                                                                                                                          |
| rat | O'Sullivan et al. (2009)  | <i>in vitro</i> | -      | aorta              | cannabidiol                             | 1 $\mu$ M                           | perf.                   | unsp.                | time-dependent vasorelaxation, in part mediated by PPAR $\gamma$                                                                                                                         |
| rat | Ho and Gardiner (2009)    | <i>in vivo</i>  | consc. | systemic           | AEA<br>R-(+)-WIN<br>55,212-2            | 3mg/kg<br>150 $\mu$ g/kg            | i.v.<br>i.v.            | CB1r<br>CB1r         | dose-dependent MAP $\downarrow$ in hypertensive rats, no effect in normotensive rats<br>MAP $\downarrow$ in hypertensive rats, MAP $\uparrow$ in normotensive rats                       |
| rat | Gardiner et al. (2009)    | <i>in vivo</i>  | consc. | systemic           | methan-<br>andamide                     | 0.5-<br>5mg/kg                      | i.v.                    | CB1r                 | CB1r-mediated renal and mesenteric vasoconstriction and hindquarter vasodilation                                                                                                         |
| rat | Mair et al. (2010)        | <i>in vitro</i> | -      | coronary artery    | AEA                                     | 1nM-<br>30 $\mu$ M                  | perf.                   | CB1r                 | concentration-dependent vasorelaxation via a sphingosine kinase-1 mechanism                                                                                                              |
| rat | Tamaki et al. (2012)      | <i>in vitro</i> | -      | mes. art.          | AEA                                     | 0.1-1nM<br>10nM-<br>1 $\mu$ M       | perf.<br>perf.          | CB1r<br>CB1r         | vasodilation<br>vasoconstriction                                                                                                                                                         |

Table S1 continued

|        |                                 |                 |             |                             |                  |                                         |                               |                |                                                                                                               |
|--------|---------------------------------|-----------------|-------------|-----------------------------|------------------|-----------------------------------------|-------------------------------|----------------|---------------------------------------------------------------------------------------------------------------|
| rat    | Iring et al. (2013)             | <i>in vivo</i>  | ur. g.a     | cerebral                    | AM-251<br>AM-404 | 10mg/kg<br>10mg/kg                      | i.v.<br>i.v.                  | unsp.<br>unsp. | no effect on CoBF<br>initial CoBF↑, systemic BP↑, followed by CoBF↓ and BP↓                                   |
| rat    | Sánchez-Pastor et al. (2014)    | <i>in vitro</i> | -           | aortic rings                | ACPA             | 0.1-50μM                                | perf.                         | CB1r           | vasorelaxation involving activation of K <sub>Ca</sub> 1.1- and inhibition of Ca <sub>v</sub> 1.2-channels    |
| rat    | MacIntyre et al. (2014)         | <i>in vitro</i> | -           | isolated retinal arterioles | Abn-CBD          | 10μM                                    | GPR18perf.<br>CB <sub>E</sub> |                | inhibition of endothelin-induced vasoconstriction, endothelium-dependent, involving SK <sub>Ca</sub> channels |
| rat    | Al Suleimani et al. (2015)      | <i>in vitro</i> | -           | sup. mes. art.              | O-1601           | 10nM-100μM                              | perf.                         | CB1r           | vasorelaxation partly endothelium-mediated in third order branch                                              |
| rat    | Baranowska-Kuczko et al. (2016) | <i>in vitro</i> | -           | aortic and mes. art. rings  | methanandamide   | 0.01-30μM                               | perf.                         | CB1r           | vasorelaxation of pre-constricted vessels                                                                     |
| mouse  | Zhang et al. (2008)             | <i>in vivo</i>  | ket-xy g.a. | cerebral                    | O-1966           | 1mg/kg                                  | i.v.<br>i.p.                  | CB2r           | rCBF↑                                                                                                         |
| rabbit | Ellis et al. (1995)             | <i>in vitro</i> | -           | cerebral                    | Δ9-THC           | 10 <sup>-13</sup> to 10 <sup>-3</sup> M | perf.                         | unsp.          | dose-dependent vasodilation                                                                                   |
| rabbit | Fleming et al. (1999)           | <i>in vitro</i> | -           | mes. art. rings             | HU 210           | μM range                                | perf.                         | CB1r           | relaxation                                                                                                    |
|        |                                 |                 |             | Δ9-THC                      | μM range         | perf.                                   | CB1r                          | CB1r           | relaxation                                                                                                    |
|        |                                 |                 |             |                             | AEA              | 0.03-30μM                               | perf.                         | CB1r           | slowly developing relaxation involvement of EDHF, activated by CB1r                                           |

Table S1 continued

|     |                           |                 |          |                            |                       |                                                                         |       |       |                                                                                                                                                                                                 |
|-----|---------------------------|-----------------|----------|----------------------------|-----------------------|-------------------------------------------------------------------------|-------|-------|-------------------------------------------------------------------------------------------------------------------------------------------------------------------------------------------------|
|     |                           |                 |          | carotid art. rings         | HU 210                | $\mu\text{M}$ range                                                     | perf. | CB1r  | no effect                                                                                                                                                                                       |
|     |                           |                 |          |                            | $\Delta 9\text{-THC}$ | $\mu\text{M}$ range                                                     | perf. | CB1r  | no effect                                                                                                                                                                                       |
|     |                           |                 |          |                            | AEA                   | 0.03-30 $\mu\text{M}$                                                   | perf. | CB1r  | no effect                                                                                                                                                                                       |
| dog | Cavero et al. (1972)      | <i>in vivo</i>  | s-p g.a. | systemic                   | $\Delta 9\text{-THC}$ | 2.5mg/kg                                                                | i.v.  | unsp. | BP $\downarrow$ , HR $\downarrow$ , cardiac output $\downarrow$ , splanchnic vasoconstriction                                                                                                   |
| dog | Cavero et al. (1973)      | <i>in vivo</i>  | s-p g.a. | systemic                   | $\Delta 9\text{-THC}$ | 39 $\mu\text{g}/\text{kg}$<br>312.5 $\mu\text{g}/\text{kg}$<br>2.5mg/kg | i.v.  | unsp. | aortic BP $\downarrow$ , cardiac output $\downarrow$ , left ventricular peak pressure $\downarrow$ , left ventricular and diastolic pressure $\downarrow$ , no effect on cerebral stroke volume |
| dog | Cavero et al. (1974)      | <i>in vivo</i>  | s-p g.a. | systemic                   | $\Delta 9\text{-THC}$ | 2.5mg/kg                                                                | i.v.  | unsp. | dose-dependent BP $\downarrow$ , HR $\downarrow$ , cardiac output $\downarrow$ , right ventricular contractile force $\downarrow$ , total peripheral vascular resistance $\downarrow$           |
| cat | Graham and Li (1973)      | <i>in vivo</i>  | ur. g.a. | hindqu.                    | c.e.                  | 10mg/kg                                                                 | i.v.  | unsp. | systemic BP $\downarrow$                                                                                                                                                                        |
|     |                           |                 |          |                            | $\Delta 1\text{-THC}$ | 0.2mg/kg                                                                | i.v.  | unsp. | pulse $\downarrow$ , resp. rate $\downarrow$ hindlimb PP $\downarrow$                                                                                                                           |
|     |                           |                 |          |                            | AEA                   | $10^{-13}$ to $10^{-3}\text{M}$                                         | perf. | CB1r  | dose-dependent vasodilation                                                                                                                                                                     |
| cat | Gebremedhin et al. (1999) | <i>in vitro</i> | -        | isolated cerebral arteries | R-(+)-WIN 55,212-2    | 10 to 100nM                                                             | perf. | CB1r  | L-type $\text{Ca}^{2+}$ -current $\downarrow$                                                                                                                                                   |
|     |                           |                 |          |                            | AEA                   | 10 to 300nM                                                             | perf. | CB1r  | L-type $\text{Ca}^{2+}$ -current $\downarrow$                                                                                                                                                   |
| cow | Pratt et al. (1998)       | <i>in vitro</i> | -        | coronary art. rings        | AEA                   | cumulative $\mu\text{M}$ range                                          | perf. | CB1r  | non CB1r-mediated vasodilation                                                                                                                                                                  |



Table S1 continued

|       |                                   |                 |   |                     |         |                                         |       |                      |                                                                                                             |
|-------|-----------------------------------|-----------------|---|---------------------|---------|-----------------------------------------|-------|----------------------|-------------------------------------------------------------------------------------------------------------|
| sheep | Grainger and Boachie-Ansah (2001) | <i>in vitro</i> | - | coronary art. rings | AEA     | 0.01-30 $\mu$ M                         | perf. | CB1r                 | concentration-dependent relaxation, in part endothelium-dependent, in part K <sup>+</sup> -channel mediated |
| pig   | Su et al. (2015)                  | <i>in vitro</i> | - | retinal arterioles  | Abn-CBD | 10 <sup>-10</sup> to 10 <sup>-4</sup> M | perf. | GPR, CB <sub>E</sub> | vasorelaxation in pre-contracted vessels, action on endothelium                                             |

Abbreviations: Consc. consciousness, Appl. application mode, Targ. target, ur. urethane, g.a. general anesthesia, hindqu. hindquarters, c.e. cannabis extract, i.v. intravenous, unsp. unspecified, BP blood pressure, HR heart rate, resp. respiratory, THC tetrahydrocannabinol, i.a. intraarterial, i.p. intraperitoneal, consc. conscious, AEA anandamide, CB1r cannabinoid receptor type 1, CB2r cannabinoid receptor type 2, CBF cerebral blood flow, rCBF regional cerebral blood flow, mes. mesenteric, art. artery, perf. perfusion, MAP mean arterial pressure, NA conc. noradrenaline concentration, max. maximum, CoBF cerebro-cortical blood flow, NADA N-arachnidonoyl-dopamine, MCA middle cerebral artery, Abn-CBD abnormal cannabidiol sup. superior, PPAR $\gamma$  Peroxisome proliferator-activated receptor gamma, ACPA arachidonylcyclopropylamide, ket-xy ketamine-xylazine, EDHF endothelium-derived hyperpolarizing factor, s-p sodium-pentobarbital, PP perfusion pressure, abnCBD abnormal cannabidiol, GPR G-protein coupled receptor 18, CB<sub>E</sub> noncannabinoid endothelial receptor.

Table S2: Studies indicative of vasoconstrictive effects of cannabinoids in animal models.

| Animal model | Reference              | <i>in vitro</i><br><i>in vivo</i> | Consc.      | Bed                 | Molecule                                                       | Dose                                              | Appl.                        | Targ.              | Effect                                                                                                                                                                                                                                                                                      |
|--------------|------------------------|-----------------------------------|-------------|---------------------|----------------------------------------------------------------|---------------------------------------------------|------------------------------|--------------------|---------------------------------------------------------------------------------------------------------------------------------------------------------------------------------------------------------------------------------------------------------------------------------------------|
| rat          | Adams et al. (1976)    | <i>in vivo</i>                    | ur.<br>g.a. | systemic<br>hindqu. | $\Delta 8$ -/ $\Delta 9$ -THC<br>$\Delta 8$ -/ $\Delta 9$ -THC | unavailable<br>unavailable                        | i.v.<br>i.a.                 | unsp.<br>unsp.     | transient BP $\uparrow$ , followed by prolonged BP $\downarrow$ , HR $\downarrow$<br>vasoconstriction                                                                                                                                                                                       |
| rat          | Siqueira et al. (1979) | <i>in vivo</i>                    | ur.<br>g.a. | systemic            | $\Delta 9$ -THC                                                | 2-<br>10mg/kg                                     | i.v.                         | unsp.              | immediate BP $\downarrow$ , HR $\downarrow$ , BP $\uparrow$ at 30", persistent BP $\downarrow$ at 5' (vagal)                                                                                                                                                                                |
| rat          | Kawasaki et al. (1980) | <i>in vivo</i>                    | ur.<br>g.a. | systemic            | $\Delta 9$ -THC                                                | 1mg/kg<br>2mg/kg<br>5mg/kg                        | i.v.                         | unsp.              | transient dose-related BP $\uparrow$ , HR $\downarrow$ (vagal)                                                                                                                                                                                                                              |
| rat          | Varga et al. (1996)    | <i>in vivo</i>                    | ur.<br>g.a. | systemic            | AEA                                                            | 4mg/kg                                            | i.v.                         | CB1r               | transient BP $\downarrow$ , brief BP $\uparrow$ , prolonged BP $\downarrow$                                                                                                                                                                                                                 |
| rat          | Bloom et al. (1997)    | <i>in vivo</i>                    | consc.      | cerebral            | $\Delta 9$ -THC<br><br>11-OH-THC                               | 0.5mg/kg<br>1mg/kg<br>4mg/kg<br>16mg/kg<br>4mg/kg | i.v.<br><br>i.v.             | unsp.<br><br>unsp. | increase and decrease of CBF depending on region (see text for details)<br><br>increase and decrease of CBF                                                                                                                                                                                 |
| rat          | Stein et al. (1998)    | <i>in vivo</i>                    | consc.      | cerebral            | AEA                                                            | 3mg/kg<br><br>10mg/kg<br><br>30mg/kg              | i.v.<br><br>i.v.<br><br>i.v. | CB1r               | no effect on rCBF<br><br>rCBF $\downarrow$ in 7 areas (including amygdala, cingulate, frontal, prepyriform, sensorimotor, claustrorocortex)<br><br>rCBF $\downarrow$ in 23 areas (including CA1 and CA3 of hippocampus, rostral core portion of nucleus accumbens, rostral caudate nucleus) |

Table S2 continued

|     |                           |                 |        |                          |                                  |                           |                |                       |                                                                                                                                                                |
|-----|---------------------------|-----------------|--------|--------------------------|----------------------------------|---------------------------|----------------|-----------------------|----------------------------------------------------------------------------------------------------------------------------------------------------------------|
| rat | Wagner et al. (2005)      | <i>in vitro</i> | -      | isolated heart           | AEA<br>Delta-THC                 | 1-100nmol<br>10-100nmol   | bolus<br>bolus | CB1r<br>unsp.         | coronary vasodilation<br>coronary vasoconstriction                                                                                                             |
| rat | O'Sullivan et al. (2005b) | <i>in vitro</i> | -      | aortic rings             | $\Delta$ 9-THC<br>AEA<br>NADA    | cumulative $\mu$ M range  | perf.          | unsp.<br>CB1r<br>CB1r | vasorelaxation/-constriction<br>vasorelaxation<br>vasorelaxation                                                                                               |
| rat | O'Sullivan et al. (2005a) | <i>in vitro</i> | -      | aortic and mes. rings    | $\Delta$ 9-THC                   | cumulative $\mu$ M range  | perf.          | unsp.                 | vasorelaxation in smaller branches, $Ca^{2+}$ -influx block; vasoconstriction in sup. mes. art. (stem) at high concentration; antagonism to AEA-vasorelaxation |
| rat | O'Sullivan et al. (2006)  | <i>in vitro</i> | -      | isolated aorta mes. art. | $\Delta$ 9-THC<br>$\Delta$ 9-THC | 10 $\mu$ M, 2h incubation | -<br>-         | unsp.                 | no effect<br>enhanced endothelium-dependent vasorelaxation in sup. mes. art. and potentiated contraction in resistance vessels                                 |
| rat | Gardiner et al. (2009)    | <i>in vivo</i>  | consc. | systemic                 | methanandamide                   | 0.5-5mg/kg                | i.v.           | CB1r                  | CB1r-mediated renal and mesenteric vasoconstriction and hindquarter vasodilation                                                                               |
| rat | Tamaki et al. (2012)      | <i>in vitro</i> | -      | mes. art.                | AEA                              | 0.1-1nM<br>10nM-1 $\mu$ M | perf.<br>perf. | CB1r<br>CB1r          | vasodilation<br>vasoconstriction                                                                                                                               |
| rat | Wenzel et al. (2013)      | <i>in vitro</i> | -      | isolated perf. lung      | AEA                              | 10 $\mu$ M                | perf.          | CB1r                  | pulmonary vasoconstriction                                                                                                                                     |

Table S2 continued

|        |                         |                 |          |                    |                  |                              |       |           |                                                                                                                                                                                       |
|--------|-------------------------|-----------------|----------|--------------------|------------------|------------------------------|-------|-----------|---------------------------------------------------------------------------------------------------------------------------------------------------------------------------------------|
| rat    | Iring et al. (2013)     | <i>in vivo</i>  | ur. g.a. | cerebral           | AM-251           | 10mg/kg                      | i.v.  | unsp.     | no effect on CoBF                                                                                                                                                                     |
|        |                         |                 |          |                    | AM-404           | 10mg/kg                      | i.v.  | unsp.     | initial CoBF $\uparrow$ , systemic BP $\uparrow$ , followed by CoBF $\downarrow$ and BP $\downarrow$                                                                                  |
| rabbit | Barbosa et al. (1981)   | <i>in vitro</i> | -        | central ear art.   | $\Delta$ 9-THC   | 15-30mM                      | perf. | unsp.     | sustained contractions by NA release                                                                                                                                                  |
| rabbit | Wahn et al. (2005)      | <i>in vitro</i> | -        | isolated lung      | AEA              | 5 $\mu$ M                    | perf. | CB1r      | pulmonary artery pressure $\uparrow$                                                                                                                                                  |
|        |                         |                 |          |                    | 2-AG             | 0.4 $\mu$                    | perf. | CB1r      | pulmonary artery pressure $\uparrow$ (via COX-2 metabolites)                                                                                                                          |
|        |                         |                 |          |                    | R-methanandamide | unsp.                        | perf. | CB1r      | no effect                                                                                                                                                                             |
|        |                         |                 |          |                    | $\Delta$ 9-THC   | unsp.                        | perf. | unsp.     | no effect                                                                                                                                                                             |
|        |                         |                 |          | HU 210             | unsp.            | perf.                        | CB1r  | no effect |                                                                                                                                                                                       |
| dog    | Cavero et al. (1972)    | <i>in vivo</i>  | s-p g.a. | systemic           | $\Delta$ 9-THC   | 2.5mg/kg                     | i.v.  | unsp.     | BP $\downarrow$ , HR $\downarrow$ , cardiac output $\downarrow$ , splanchnic vasoconstriction                                                                                         |
| dog    | Cavero et al. (1974)    | <i>in vivo</i>  | s-p g.a. | systemic           | $\Delta$ 9-THC   | 2.5mg/kg                     | i.v.  | unsp.     | dose-dependent BP $\downarrow$ , HR $\downarrow$ , cardiac output $\downarrow$ , right ventricular contractile force $\downarrow$ , total peripheral vascular resistance $\downarrow$ |
| dog    | Jandhyala et al. (1976) | <i>in vivo</i>  | s-p g.a. | systemic           | $\Delta$ 9-THC   | 2.5mg/kg                     | i.v.  | unsp.     | HR $\downarrow$ , pulmonary blood flow $\downarrow$ , pulmonary artery pressure $\uparrow$ , pulmonary vascular resistance $\uparrow$                                                 |
| pig    | Vaddady et al. (2011)   | <i>in vivo</i>  | g.a.     | hemor. shock model | $\Delta$ 9-THC   | 0.5mg/kg<br>1mg/kg<br>4mg/kg | i.v.  | unsp.     | selective vasoconstriction in liver microvasculature                                                                                                                                  |

Abbreviations: Consc. consciousness, Appl. application mode, Targ. target, ur. urethane, g.a. general anesthesia, THC tetrahydrocannabinol, i.v. intravenous, unsp. unspecified, BP blood pressure, HR heart rate, hindqu. hindquarters, i.a. intraarterial, AEA anandamide, CB1r cannabinoid receptor type 1, CB2r cannabinoid receptor type 2, consc. conscious, CBF cerebral blood flow, rCBF regional cerebral blood flow, perf. perfusion, NADA N-arachnidonoyl-dopamine, mes. mesenteric, art. artery, CoBF cerebrocortical blood flow, NA noradrenaline, s-p sodium-pentobarbital, hem. hemorrhagic.

## REFERENCES

- Adams, M. D., Earnhardt, J. T., Dewey, W. L., and Harris, L. S. (1976). Vasoconstrictor actions of delta8- and delta9-tetrahydrocannabinol in the rat. *J Pharmacol Exp Ther* 196, 649–56. url:jpet.aspetjournals.org
- Al Suleimani, Y. M., Al Mahruqi, A. S., and Hiley, C. R. (2015). Mechanisms of vasorelaxation induced by the cannabidiol analogue compound o-1602 in the rat small mesenteric artery. *Eur J Pharmacol* 765, 107–14. doi:10.1016/j.ejphar.2015.08.021
- Baranowska-Kuczko, M., Kozłowska, H., Kloza, M., Karpińska, O., Toczek, M., Harasim, E., et al. (2016). Protective role of cannabinoid cb1 receptors and vascular effects of chronic administration of faah inhibitor urb597 in doca-salt hypertensive rats. *Life Sci* 151, 288–299. doi:10.1016/j.lfs.2016.03.014
- Barbosa, P. P., Lapa, A. J., Lima-Landman, M. T., and Valle, J. R. (1981). Vasoconstriction induced by delta 9-tetrahydrocannabinol on the perfused rabbit ear artery. *Arch Int Pharmacodyn Ther* 252, 253–61. Abstract retrieved from <http://ncbi.nlm.nih.gov> (Accession No. 6272661)
- Bloom, A. S., Tershner, S., Fuller, S. A., and Stein, E. A. (1997). Cannabinoid-induced alterations in regional cerebral blood flow in the rat. *Pharmacol Biochem Behav* 57, 625–31. doi:10.1016/S0091-3057(96)00475-3
- Breyne, J., Van de Voorde, J., and Vanheel, B. (2006). Characterization of the vasorelaxation to methanandamide in rat gastric arteries. *Can J Physiol Pharmacol* 84, 1121–32. doi:10.1139/y06-058
- Cavero, I., Buckley, J. P., and Jandhyala, B. S. (1973). Hemodynamic and myocardial effects of (-)-delta9-trans-tetrahydrocannabinol in anesthetized dogs. *Eur J Pharmacol* 24, 243–51. doi:10.1016/0014-2999(73)90078-2
- Cavero, I., Ertel, R., Buckley, J. P., and Jandhyala, B. S. (1972). Effects of (-)-9-trans-tetrahydrocannabinol on regional blood flow in anesthetized dogs. *Eur J Pharmacol* 20, 373–6. doi:10.1016/0014-2999(72)90201-4
- Cavero, I., Lokhandwala, M. F., Buckley, J. P., and Jandhyala, B. S. (1974). The effect of (minus)-delta 9-trans-tetrahydrocannabinol on myocardial contractility and venous return in anesthetized dogs. *Eur J Pharmacol* 29, 74–82. doi:10.1016/0014-2999(74)90172-1
- Ellis, E. F., Moore, S. F., and Willoughby, K. A. (1995). Anandamide and delta 9-thc dilation of cerebral arterioles is blocked by indomethacin. *Am J Physiol* 269, H1859–64. doi:10.1152/ajpheart.1995.269.6.H1859
- Fleming, I., Schermer, B., Popp, R., and Busse, R. (1999). Inhibition of the production of endothelium-derived hyperpolarizing factor by cannabinoid receptor agonists. *Br J Pharmacol* 126, 949–60. doi:10.1038/sj.bjp.0702381
- Gardiner, S. M., March, J. E., Kemp, P. A., and Bennett, T. (2009). Factors influencing the regional haemodynamic responses to methanandamide and anandamide in conscious rats. *Br J Pharmacol* 158, 1143–52. doi:10.1111/j.1476-5381.2009.00363.x
- Gebremedhin, D., Lange, A. R., Campbell, W. B., Hillard, C. J., and Harder, D. R. (1999). Cannabinoid cb1 receptor of cat cerebral arterial muscle functions to inhibit l-type ca2+ channel current. *Am J Physiol* 276, H2085–93. doi:10.1152/ajpheart.1999.276.6.H2085
- Graham, J. D. and Li, D. M. (1973). Cardiovascular and respiratory effects of cannabis in cat and rat. *Br J Pharmacol* 49, 1–10. doi:10.1111/j.1476-5381.1973.tb08262.x
- Grainger, J. and Boachie-Ansah, G. (2001). Anandamide-induced relaxation of sheep coronary arteries: the role of the vascular endothelium, arachidonic acid metabolites and potassium channels. *Br J Pharmacol* 134, 1003–12. doi:10.1038/sj.bjp.0704340

- Hillard, C. J., Ho, W.-S., Thompson, J., Gauthier, K. M., Wheelock, C. E., Huang, H., et al. (2007). Inhibition of 2-arachidonoylglycerol catabolism modulates vasoconstriction of rat middle cerebral artery by the thromboxane mimetic, u-46619. *Br J Pharmacol* 152, 691–8. doi:10.1038/sj.bjp.0707468
- Ho, W.-S. V. and Gardiner, S. M. (2009). Acute hypertension reveals depressor and vasodilator effects of cannabinoids in conscious rats. *Br J Pharmacol* 156, 94–104. doi:10.1111/j.1476-5381.2008.00034.x
- Ho, W.-S. V. and Hiley, C. R. (2003). Endothelium-independent relaxation to cannabinoids in rat-isolated mesenteric artery and role of  $ca^{2+}$  influx. *Br J Pharmacol* 139, 585–97. doi:10.1038/sj.bjp.0705280
- Iring, A., Ruisanchez, É., Leszl-Ishiguro, M., Horváth, B., Benkő, R., Lacza, Z., et al. (2013). Role of endocannabinoids and cannabinoid-1 receptors in cerebrocortical blood flow regulation. *PLoS One* 8, e53390. doi:10.1371/journal.pone.0053390
- Jandhyala, B. S., Malloy, K. P., and Buckley, J. P. (1976). Effects of acute administration of delta9-tetrahydrocannabinol on pulmonary hemodynamics of anesthetized dogs. *Eur J Pharmacol* 38, 183–7. doi:10.1016/0014-2999(76)90216-8
- Kawasaki, H., Watanabe, S., Oishi, R., and Ueki, S. (1980). Effects of delta-9-tetrahydrocannabinol on the cardiovascular system, and pressor and behavioral responses to brain stimulation in rats. *Jpn J Pharmacol* 30, 493–502. doi:10.1254/jjp.30.493
- Kosersky, D. S. (1978). Antihypertensive effects of delta9-tetrahydrocannabinol. *Arch Int Pharmacodyn Ther* 233, 76–81. Abstract retrieved from <http://ncbi.nlm.nih.gov> (Accession No. 686909)
- MacIntyre, J., Dong, A., Straiker, A., Zhu, J., Howlett, S. E., Bagher, A., et al. (2014). Cannabinoid and lipid-mediated vasorelaxation in retinal microvasculature. *Eur J Pharmacol* 735, 105–14. doi:10.1016/j.ejphar.2014.03.055
- Mair, K. M., Robinson, E., Kane, K. A., Pyne, S., Brett, R. R., Pyne, N. J., et al. (2010). Interaction between anandamide and sphingosine-1-phosphate in mediating vasorelaxation in rat coronary artery. *Br J Pharmacol* 161, 176–92. doi:10.1111/j.1476-5381.2010.00878.x
- Niederhoffer, N., Schmid, K., and Szabo, B. (2003). The peripheral sympathetic nervous system is the major target of cannabinoids in eliciting cardiovascular depression. *Naunyn Schmiedebergs Arch Pharmacol* 367, 434–43. doi:10.1007/s00210-003-0755-y
- O’Sullivan, S. E., Kendall, D. A., and Randall, M. D. (2005a). The effects of delta9-tetrahydrocannabinol in rat mesenteric vasculature, and its interactions with the endocannabinoid anandamide. *Br J Pharmacol* 145, 514–26. doi:10.1038/sj.bjp.0706218
- O’Sullivan, S. E., Kendall, D. A., and Randall, M. D. (2005b). Vascular effects of delta 9-tetrahydrocannabinol (thc), anandamide and n-arachidonoyldopamine (nada) in the rat isolated aorta. *Eur J Pharmacol* 507, 211–21. doi:10.1016/j.ejphar.2004.11.056
- O’Sullivan, S. E., Kendall, D. A., and Randall, M. D. (2006). Further characterization of the time-dependent vascular effects of delta9-tetrahydrocannabinol. *J Pharmacol Exp Ther* 317, 428–38. doi:10.1124/jpet.105.095828
- O’Sullivan, S. E., Randall, M. D., and Gardiner, S. M. (2007). The in vitro and in vivo cardiovascular effects of delta9-tetrahydrocannabinol in rats made hypertensive by chronic inhibition of nitric-oxide synthase. *J Pharmacol Exp Ther* 321, 663–72. doi:10.1124/jpet.106.116566
- O’Sullivan, S. E., Sun, Y., Bennett, A. J., Randall, M. D., and Kendall, D. A. (2009). Time-dependent vascular actions of cannabidiol in the rat aorta. *Eur J Pharmacol* 612, 61–8. doi:10.1016/j.ejphar.2009.03.010
- O’Sullivan, S. E., Tarling, E. J., Bennett, A. J., Kendall, D. A., and Randall, M. D. (2005c). Novel time-dependent vascular actions of delta9-tetrahydrocannabinol mediated by peroxisome proliferator-activated receptor gamma. *Biochem Biophys Res Commun* 337, 824–31. doi:10.1016/j.bbrc.2005.09.121

- Pakdeechote, P., Dunn, W. R., and Ralevic, V. (2007). Cannabinoids inhibit noradrenergic and purinergic sympathetic cotransmission in the rat isolated mesenteric arterial bed. *Br J Pharmacol* 152, 725–33. doi:10.1038/sj.bjp.0707397
- Pratt, P. F., Hillard, C. J., Edgemond, W. S., and Campbell, W. B. (1998). N-arachidonylethanolamide relaxation of bovine coronary artery is not mediated by cb1 cannabinoid receptor. *Am J Physiol* 274, H375–81. doi:10.1152/ajpheart.1998.274.1.H375
- Sánchez-Pastor, E., Andrade, F., Sánchez-Pastor, J. M., Elizalde, A., Huerta, M., Virgen-Ortiz, A., et al. (2014). Cannabinoid receptor type 1 activation by arachidonylcyclopropylamide in rat aortic rings causes vasorelaxation involving calcium-activated potassium channel subunit alpha-1 and calcium channel, voltage-dependent, I type, alpha 1c subunit. *Eur J Pharmacol* 729, 100–6. doi:10.1016/j.ejphar.2014.02.016
- Siqueira, S. W., Lapa, A. J., and Ribeiro do Valle, J. (1979). The triple effect induced by delta 9-tetrahydrocannabinol on the rat blood pressure. *Eur J Pharmacol* 58, 351–7. doi:10.1016/0014-2999(79)90305-4
- Stein, E. A., Fuller, S. A., Edgemond, W. S., and Campbell, W. B. (1998). Selective effects of the endogenous cannabinoid arachidonylethanolamide (anandamide) on regional cerebral blood flow in the rat. *Neuropsychopharmacology* 19, 481–91. doi:10.1016/S0893-133X(98)00043-8
- Su, E.-N., Kelly, M. E., Cringle, S. J., and Yu, D.-Y. (2015). Role of endothelium in abnormal cannabidiol-induced vasoactivity in retinal arterioles. *Invest Ophthalmol Vis Sci* 56, 4029–37. doi:10.1167/iovs.14-14879
- Tamaki, C., Nawa, H., Takatori, S., Oda, S., Sendo, T., Zamami, Y., et al. (2012). Anandamide induces endothelium-dependent vasoconstriction and cgrpergic nerve-mediated vasodilatation in the rat mesenteric vascular bed. *J Pharmacol Sci* 118, 496–505. doi:10.1254/jphs.11236FP
- Vaddady, P. K., Mehrotra, N., Zhang, X., Yates, C. R., Moore, B. M., and Meibohm, B. (2011). Pharmacokinetics of a combination of delta9-tetrahydro-cannabinol and celecoxib in a porcine model of hemorrhagic shock. *Biopharm Drug Dispos* 32, 89–98. doi:10.1002/bdd.740
- Varga, K., Lake, K. D., Huangfu, D., Guyenet, P. G., and Kunos, G. (1996). Mechanism of the hypotensive action of anandamide in anesthetized rats. *Hypertension* 28, 682–6. doi:10.1161/01.HYP.28.4.682
- Wagner, J. A., Abesser, M., Karcher, J., Laser, M., and Kunos, G. (2005). Coronary vasodilator effects of endogenous cannabinoids in vasopressin-precontracted unpaced rat isolated hearts. *J Cardiovasc Pharmacol* 46, 348–55. doi:10.1097/01.fjc.0000175437.87283.f2
- Wahn, H., Wolf, J., Kram, F., Frantz, S., and Wagner, J. A. (2005). The endocannabinoid arachidonyl ethanolamide (anandamide) increases pulmonary arterial pressure via cyclooxygenase-2 products in isolated rabbit lungs. *Am J Physiol Heart Circ Physiol* 289, H2491–6. doi:10.1152/ajpheart.00718.2005
- Wenzel, D., Matthey, M., Bindila, L., Lerner, R., Lutz, B., Zimmer, A., et al. (2013). Endocannabinoid anandamide mediates hypoxic pulmonary vasoconstriction. *Proc Natl Acad Sci U S A* 110, 18710–5. doi:10.1073/pnas.1308130110
- Wheal, A. J., Bennett, T., Randall, M. D., and Gardiner, S. M. (2007). Cardiovascular effects of cannabinoids in conscious spontaneously hypertensive rats. *Br J Pharmacol* 152, 717–24. doi:10.1038/sj.bjp.0707410
- White, R. and Hiley, C. R. (1998). The actions of some cannabinoid receptor ligands in the rat isolated mesenteric artery. *Br J Pharmacol* 125, 533–41. doi:10.1038/sj.bjp.0702111
- Zhang, M., Martin, B. R., Adler, M. W., Razdan, R. K., Ganea, D., and Tuma, R. F. (2008). Modulation of the balance between cannabinoid cb(1) and cb(2) receptor activation during cerebral ischemic/reperfusion injury. *Neuroscience* 152, 753–60. doi:10.1016/j.neuroscience.2008.01.022
